# Supplementary material
Source: PubMed Central journal article supplement (PMC7539637)
Supplement: NIHMS1632626-supplement-Supplemental_tables_and_figures.pdf [file NIHMS1632626-supplement-Supplemental_tables_and_figures.pdf]

# Supporting Information

## Using 10,000 fragment ions to inform scoring in native top-down proteomics

Ashley N. Ives<sup>1</sup>, Taojunfeng Su<sup>1</sup>, Kenneth R. Durbin<sup>1,2</sup>, Bryan P. Early<sup>1</sup>, Henrique dos Santos Seckler<sup>1</sup>, Ryan T. Fellers<sup>1,2</sup>, Richard D. LeDuc<sup>1</sup>, Luis F. Schachner<sup>1</sup>, Steven M. Patrie<sup>1</sup>, Neil L. Kelleher<sup>1,2\*</sup>

<sup>1</sup>Departments of Chemistry and Molecular Biosciences, the Chemistry of Life Processes Institute, and the Proteomics Center of Excellence, Northwestern University, 2170 Campus Drive, Evanston, IL 60208, United States of America

<sup>2</sup>Proteinaceous, Inc., P.O. Box 1839, Evanston, IL 60204, United States of America

\*Corresponding author (email: [n-kelleher@northwestern.edu](mailto:n-kelleher@northwestern.edu))

**Table S1.** Structures from the Protein Data Bank (PDB) used for structural studies of native monomers. Uniprot accessions and gene names correspond to those identified by prior mass spectrometry studies. Precursor charge state is also shown as ratios of the actual charge ( $Z_{Actual}$ ) and the Rayleigh charge limit for a given protein ( $Z_R$ ), where low charge (L) is defined as  $Z_{Actual}/Z_R < 0.86$ , intermediate charge (M) is defined as  $0.86 \leq Z_{Actual}/Z_R \leq 1.43$ , and high charge is defined as  $Z_{Actual}/Z_R > 1.43$ .

| PDB ID | Chain | Uniprot Accession | Charge State | Gene Name |
|--------|-------|-------------------|--------------|-----------|
| 11gs   | A     | P09211            | L            | GSTP1     |
| 1a3s   | A     | P63279            | L            | UBC9      |
| 1ak4   | A     | P62937            | L            | PPIA      |
| 1ald   | A     | P04075            | L            | ALDOA     |
| 1avh   | A     | P08758            | L            | ANXA5     |
| 1b56   | A     | Q01469            | L            | FABP5     |
| 1c4z   | D     | P68036            | L            | UB2L3     |
| 1cc0   | E     | P52565            | L            | GDIR1     |
| 1dpt   | A     | P30046            | M            | DOPD      |
| 1ejf   | A     | Q15185            | L            | TEBP      |
| 1fe0   | A     | O00244            | L            | ATOX1     |
| 1fw1   | A     | O43708            | L            | MAAI      |
| 1gy5   | A     | P61970            | L            | NTF2      |
| 1j3s   | A     | P99999            | L            | CYC       |
| 1j7d   | B     | P61088            | H            | UBE2N     |
| 1k5d   | B     | P43487            | L            | RANG      |
| 1mzw   | A     | O43447            | L            | PPIH      |
| 1nsk   | L     | P22392            | M            | NDKB      |
| 1q8g   | A     | P23528            | H            | COF1      |
| 1sj6   | A     | Q9H299            | L            | SH3L3     |
| 1tev   | A     | P30085            | L            | KCY       |
| 1u6t   | A     | O75368            | L            | SH3L1     |
| 1vfq   | A     | Q14019            | L            | COTL1     |
| 1wxs   | A     | P61960            | L            | UFM1      |
| 1xyh   | A     | Q9H2H8            | M            | PPIL3     |
| 1z83   | A     | P00568            | L            | KAD1      |
| 2a4d   | A     | Q13404            | L            | UB2V1     |
| 2dho   | A     | Q13907            | L            | IDI1      |
| 2etl   | A     | P09936            | L            | UCHL1     |
| 2g76   | A     | O43175            | M            | SERA      |
| 2l0y   | B     | Q14061            | L            | COX17     |
| 2l2o   | A     | Q9P1F3            | L            | ABRAL     |
| 2rii   | A     | Q06830            | M            | PRDX1     |
| 3iar   | A     | P00813            | L            | ADA       |
| 3jts   | B     | P61769            | M            | B2MG      |
| 4ayz   | A     | Q9Y5Z4            | L            | HEBP2     |
| 5bn8   | A     | P0DMV8            | M            | HS71A     |
| 5dlq   | E     | P63241            | L            | IF5A1     |

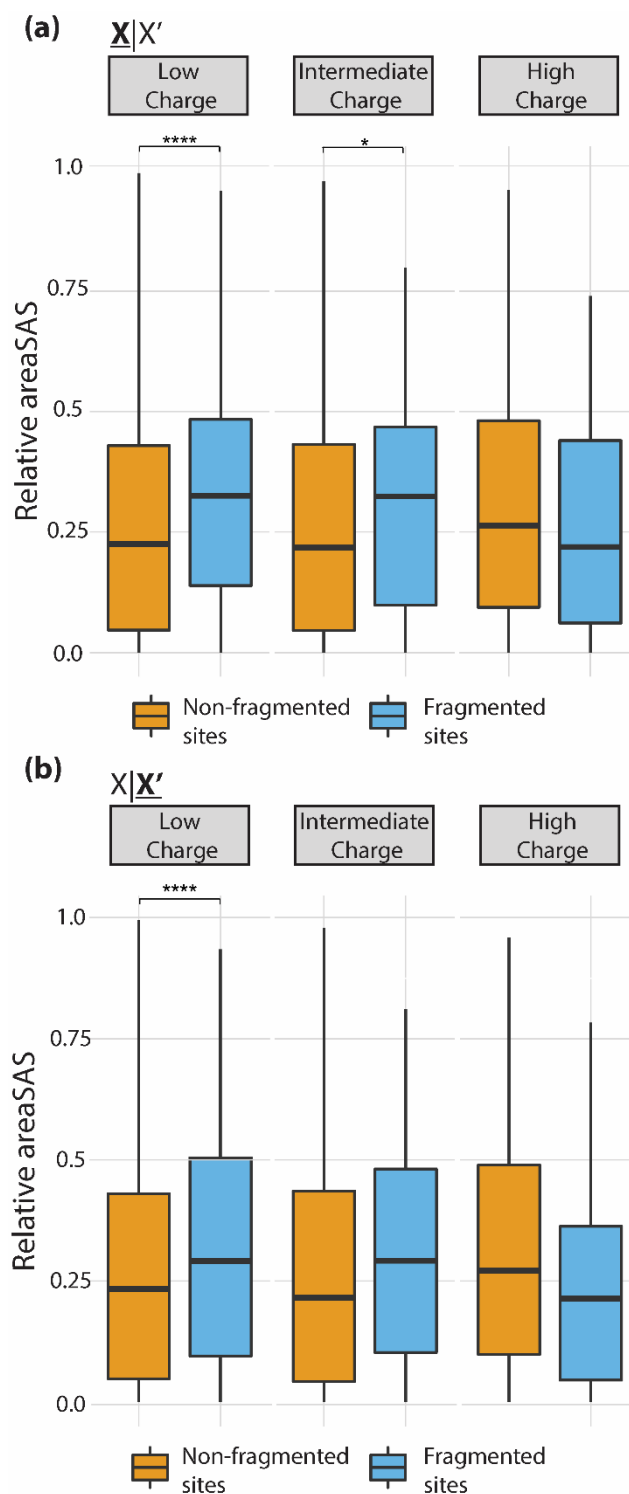

**Figure S1.** Distribution of relative areaSAS for non-fragmented (gold) versus fragmented (blue) sites for native monomers. Plots are grouped by charge state (low, intermediate, or high), and separated by the (a) N-terminal ( $X|X'$ ) or (b) C-terminal ( $X|X'$ ) residue bordering the site of interest. Asterisks denote significant differences in the means between non-fragmented and fragmented sites as determined using a Wilcoxon-Mann-Whitney test ( $p < 0.05$  is denoted by one asterisk and  $p \leq 0.0001$  is denoted by four asterisks).

**Table S2.** Structures from the Protein Data Bank (PDB) used for structural studies of denatured proteins. Uniprot accessions and gene names correspond to those identified by prior mass spectrometry studies. Data are not divided based on ratios of the actual charge ( $Z_{Actual}$ ) and the Rayleigh charge limit for a given protein ( $Z_R$ ), as this calculation assumes the protein of interest is globular.

| PDB ID | Chain | Uniprot Accession | Gene Name |
|--------|-------|-------------------|-----------|
| 1f16   | A     | Q07812            | BAX       |
| 1few   | A     | Q9NR28            | DBLOH     |
| 1hur   | A     | P84077            | ARF1      |
| 1j7d   | B     | P61088            | UBE2N     |
| 1pc2   | A     | Q9Y3D6            | FIS1      |
| 1z09   | A     | Q9NP97            | DLRB1     |
| 1z6x   | A     | P18085            | ARF4      |
| 2a5d   | A     | P62330            | ARF6      |
| 2b6h   | A     | P84085            | ARF5      |
| 2dud   | A     | Q04837            | SSBP      |
| 2ezd   | A     | P17096            | HMGA1     |
| 2hf6   | A     | P61923            | COPZ1     |
| 2l9i   | A     | P06454            | PTMA      |
| 2los   | A     | Q9P0S9            | TM14C     |
| 2uz8   | A     | O43324            | MCA3      |
| 2xqq   | A     | Q96FJ2            | DYL2      |
| 3ci9   | A     | O75506            | HSBP1     |
| 3cw1   | 3     | P62308            | RUXG      |
| 3egx   | D     | O15155            | BET1      |
| 3ich   | A     | P23284            | PPIB      |
| 3j7y   | K     | Q9BYD1            | RM13      |
| 3jcr   | 8     | O95777            | LSM8      |
| 3jts   | B     | P61769            | B2MG      |
| 3x1s   | D     | P33778            | H2B1B     |
| 4pj1   | 1     | P61604            | CH10      |
| 5gt3   | C     | P20671            | H2A1D     |
| 5vok   | B     | Q0VGL1            | LTOR4     |
| 5xtb   | L     | O43181            | NDUS4     |
| 6c0w   | C     | Q93077            | H2A1C     |
| 6ii6   | C     | P61204            | ARF3      |
| 6o58   | B     | Q9H4I9            | EMRE      |

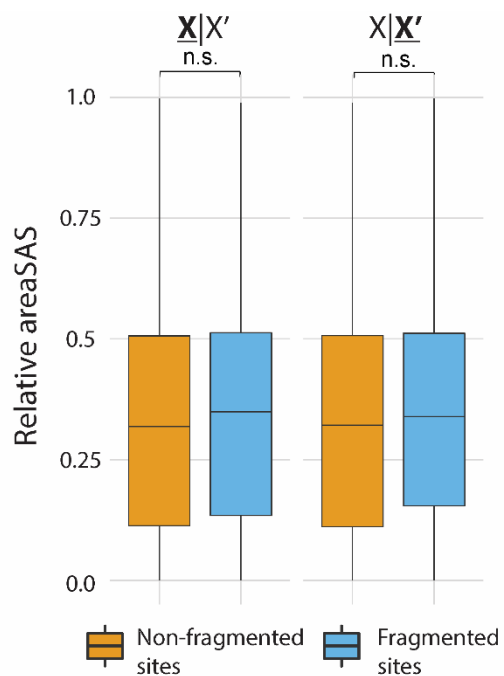

**Figure S2.** Distribution of relative areaSAS for non-fragmented (gold) versus fragmented (blue) sites for denatured proteins. Plots are separated by the N-terminal (X|X') or C-terminal (X|X') residue bordering the site of interest. Significant differences in the means between non-fragmented and fragmented sites were determined using a Wilcoxon-Mann-Whitney test.

**Table S3.** Percent probability density of residue pairs versus relative areaSAS. Relative areaSAS is divided into bins of size 0.1. Data are divided into the N-terminal (X|X')(top) and C-terminal (X|X')(bottom) residue bordering the site of interest. Data are further divided into non-fragmented sites versus fragmented sites, and grouped into low (L), intermediate (M), and high (H) precursor charge states based on the ratio of the actual charge ( $Z_{Actual}$ ) and the Rayleigh charge limit for a given protein ( $Z_R$ ); low charge (L) is defined as  $Z_{Actual}/Z_R < 0.86$ , intermediate charge (M) is defined as  $0.86 \leq Z_{Actual}/Z_R \leq 1.43$ , and high charge is defined as  $Z_{Actual}/Z_R > 1.43$ .

|              |                  | N-terminal ( <u>X X'</u> ) Residues |         |         |         |         |         |         |         |         |         |  |
|--------------|------------------|-------------------------------------|---------|---------|---------|---------|---------|---------|---------|---------|---------|--|
| Charge state | Relative areaSAS | 0.0-0.1                             | 0.1-0.2 | 0.2-0.3 | 0.3-0.4 | 0.4-0.5 | 0.5-0.6 | 0.6-0.7 | 0.7-0.8 | 0.8-0.9 | 0.9-1.0 |  |
| L            | Non-fragmented   | 33.2                                | 13.5    | 13.4    | 11.4    | 10.6    | 8.3     | 5.5     | 2.8     | 1.1     | 0.2     |  |
| L            | Fragmented       | 20.9                                | 10.5    | 15.4    | 14.6    | 16.7    | 9.7     | 7.2     | 2.9     | 1.7     | 0.4     |  |
| M            | Non-fragmented   | 34.0                                | 13.5    | 12.8    | 11.2    | 11.3    | 7.7     | 5.4     | 2.8     | 1.2     | 0.2     |  |
| M            | Fragmented       | 12.2                                | 5.8     | 4.2     | 58.7    | 9.5     | 5.3     | 3.7     | 0.5     | 0.0     | 0.0     |  |
| H            | Non-fragmented   | 26.1                                | 16.5    | 11.6    | 12.9    | 9.2     | 9.6     | 8.0     | 4.4     | 0.8     | 0.8     |  |
| H            | Fragmented       | 35.4                                | 12.3    | 12.3    | 9.2     | 10.8    | 7.7     | 10.8    | 1.5     | 0.0     | 0.0     |  |
|              |                  | C-terminal ( <u>X X'</u> ) Residues |         |         |         |         |         |         |         |         |         |  |
| Charge state | Relative areaSAS | 0.0-0.1                             | 0.1-0.2 | 0.2-0.3 | 0.3-0.4 | 0.4-0.5 | 0.5-0.6 | 0.6-0.7 | 0.7-0.8 | 0.8-0.9 | 0.9-1.0 |  |
| L            | Non-fragmented   | 32.6                                | 13.2    | 13.7    | 11.8    | 11.3    | 8.2     | 5.3     | 2.6     | 1.0     | 0.2     |  |
| L            | Fragmented       | 26.2                                | 12.7    | 12.7    | 11.2    | 11.2    | 10.3    | 8.4     | 4.9     | 1.9     | 0.4     |  |
| M            | Non-fragmented   | 34.1                                | 13.6    | 12.3    | 11.2    | 11.8    | 8.1     | 4.9     | 2.6     | 1.1     | 0.2     |  |
| M            | Fragmented       | 24.7                                | 10.1    | 16.9    | 12.4    | 12.4    | 4.5     | 14.6    | 3.4     | 1.1     | 0.0     |  |
| H            | Non-fragmented   | 25.3                                | 16.9    | 10.8    | 12.0    | 10.4    | 10.0    | 9.2     | 3.6     | 0.8     | 0.8     |  |
| H            | Fragmented       | 38.5                                | 10.8    | 15.4    | 12.3    | 6.2     | 6.2     | 6.2     | 4.6     | 0.0     | 0.0     |  |

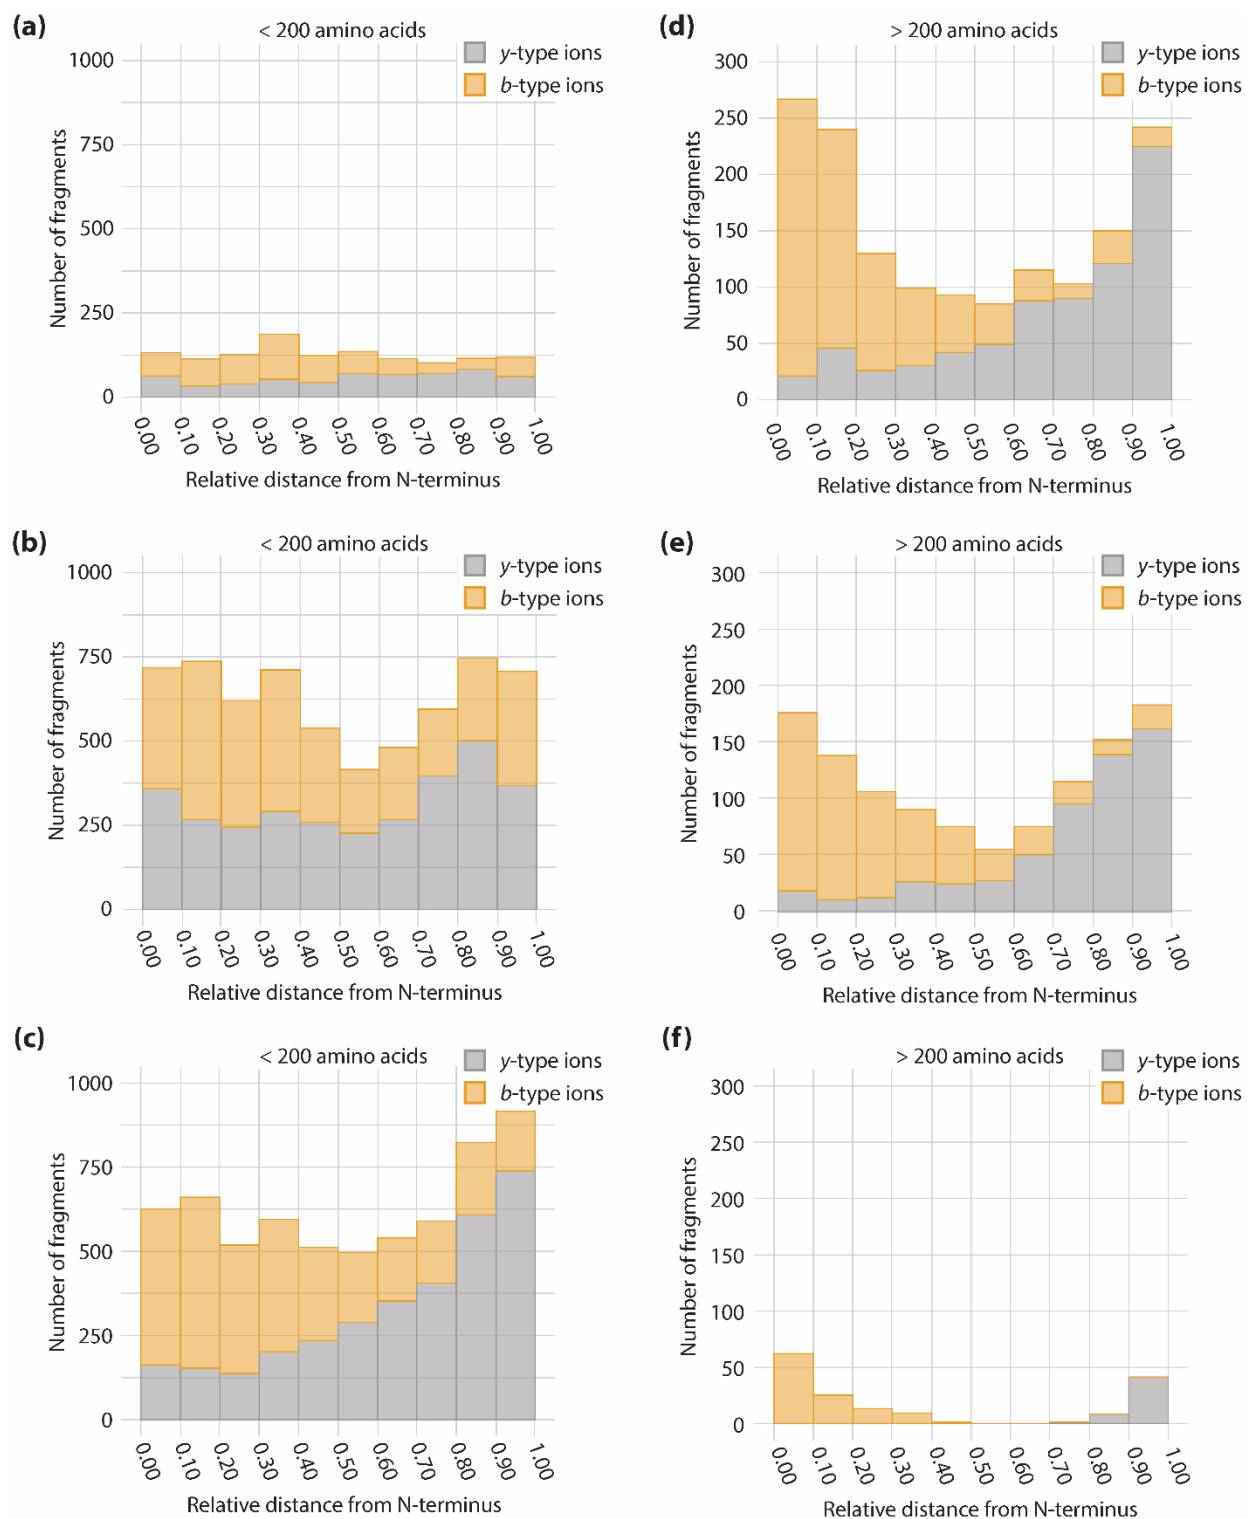

**Figure S3.** The number of fragmentation events binned by relative position from the N-terminus of a given protein. Bins represent regions  $1/10^{\text{th}}$  of the total protein length. Distributions are shown for (a) native multimers, (b) native monomers, and (c) denatured proteins under 200 amino acids in length. Distributions are also shown for (d) native multimers, (e) native monomers, and (f) denatured proteins over 200 amino acids in length. Data are divided into y-type (gray) and b-type (gold) ions.

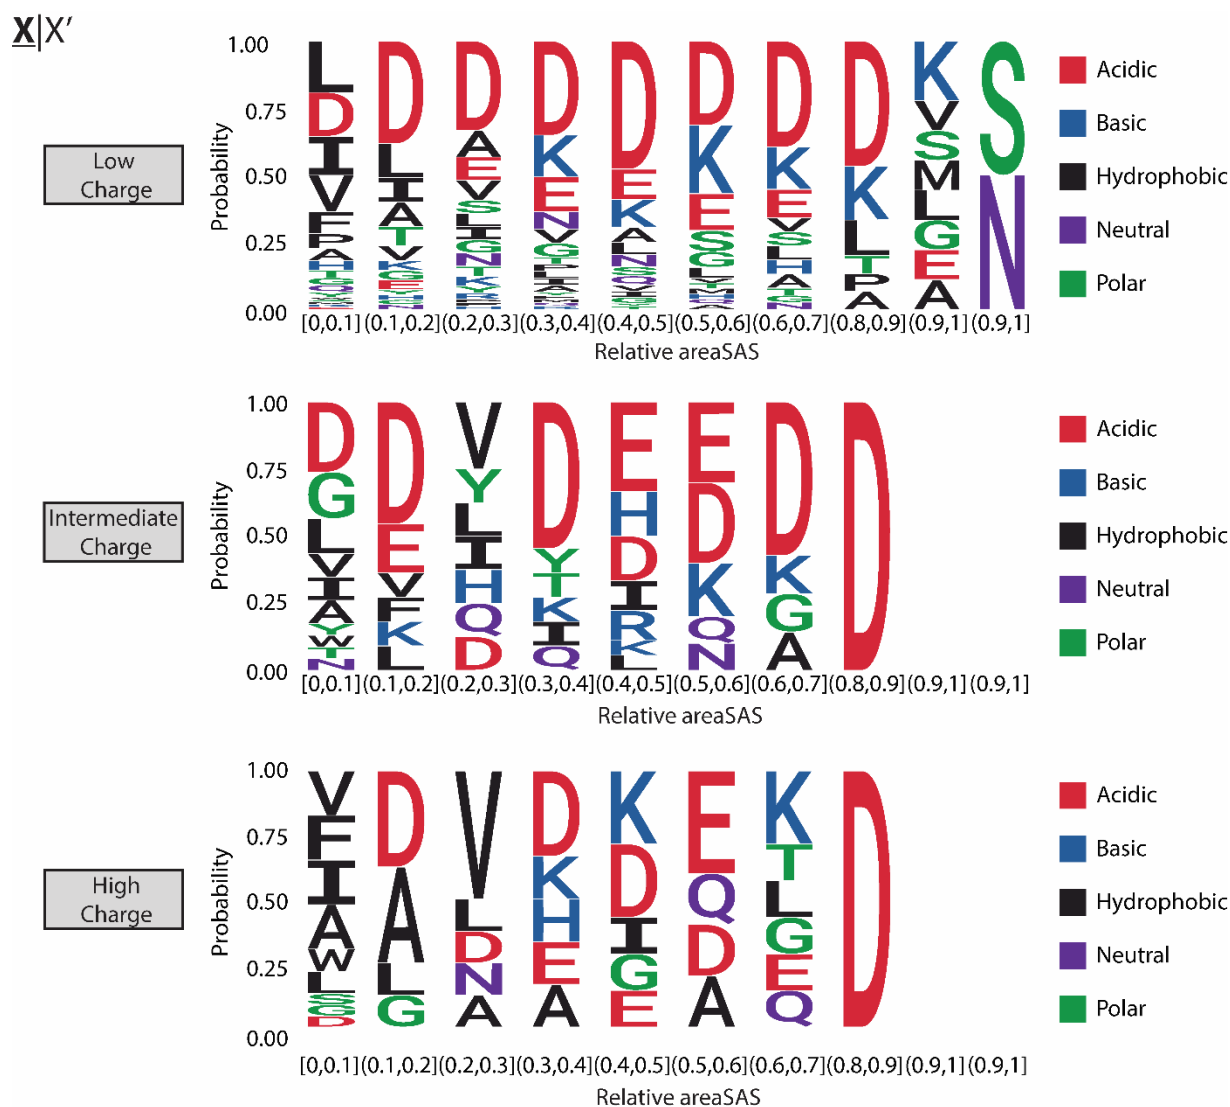

**Figure S4.** Sequence logos showing N-terminal ( $X|X'$ ) residue identity for a given fragment. The x-axis represents the corresponding relative areaSAS scores broken into bins of size 0.1. Logos are prepared using the R Studio package “ggseqlogo”. Logos are grouped by precursor charge state (low, intermediate, or high). Letter size (probability) is proportional to the occurrence of a residue for a fragment within the specified relative areaSAS range. Amino acids are divided into five categories: acidic (red), basic (blue), hydrophobic (black), neutral (purple), and polar (green).



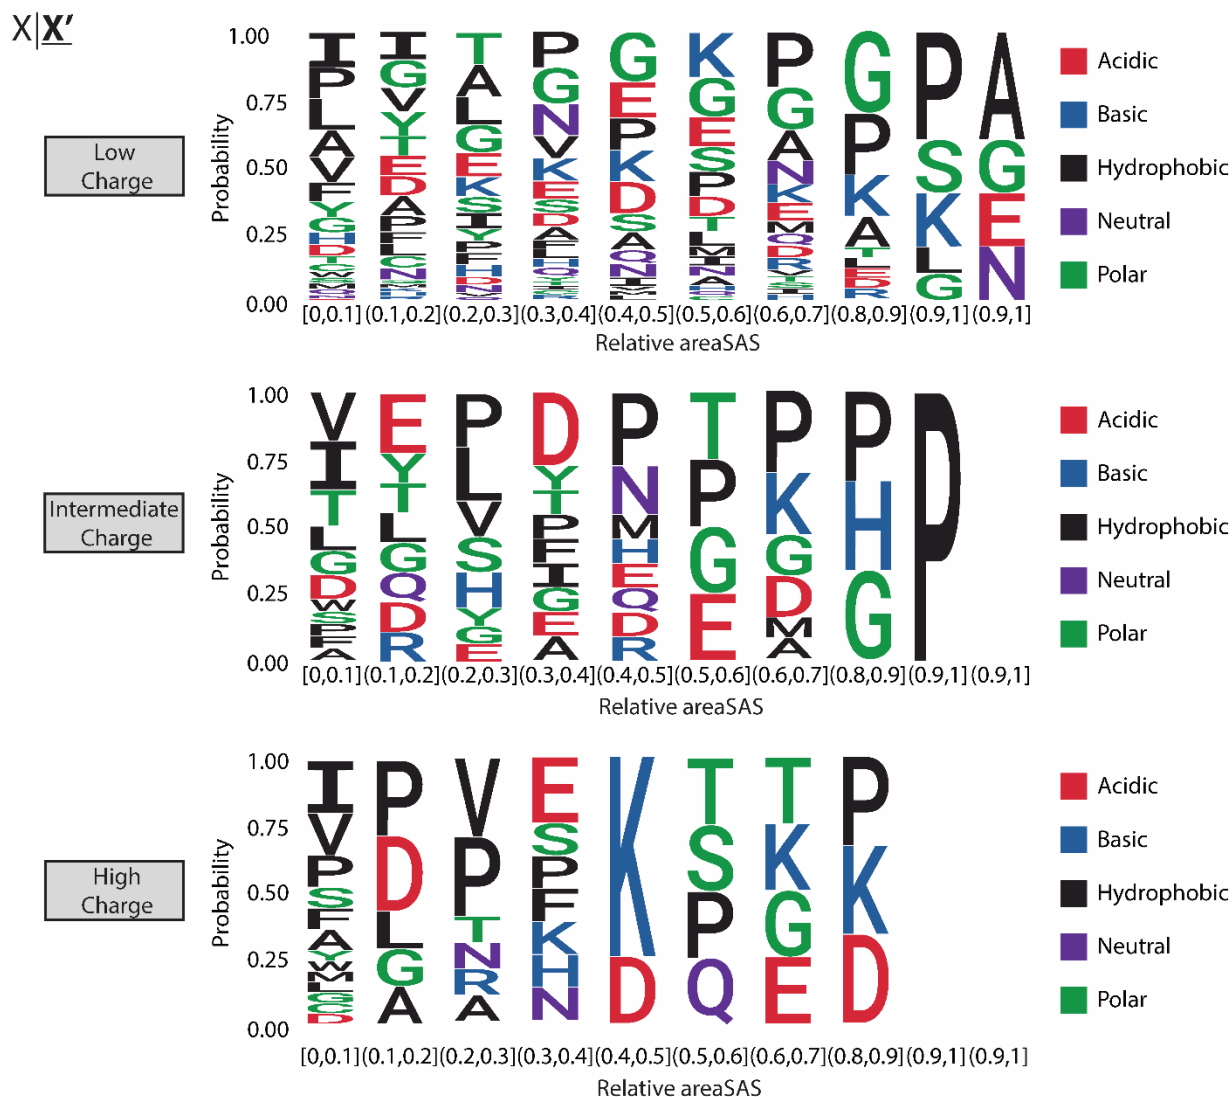

**Figure S5.** Sequence logos showing C-terminal (X|X') residue identity for a given fragment. The x-axis represents the corresponding relative areaSAS scores broken into bins of size 0.1. Logos are prepared using the R Studio package "ggseqlogo". Logos are grouped by precursor charge state (low, intermediate, or high). Letter size (probability) is proportional to the occurrence of a residue for a fragment within the specified relative areaSAS range. Amino acids are divided into five categories: acidic (red), basic (blue), hydrophobic (black), neutral (purple), and polar (green).

**Table S4.** Summary of percent occurrence within the primary sequence and percent contribution to total fragment number and intensity by residue pair type. Values are shown as Mean  $\pm$  S.D. Averages are calculated within the context of a single protein and then averaged across the entire respective dataset. Data are divided between native monomers (monomeric), native complexes (multimeric), and denatured proteins (denatured).

|            |                                          | Monomeric       | Multimeric      | Denatured       |
|------------|------------------------------------------|-----------------|-----------------|-----------------|
| DIX        | Average % occurrence in primary sequence | 5.9 $\pm$ 2.0   | 5.6 $\pm$ 1.4   | 4.2 $\pm$ 2.8   |
|            | Average % of total fragments             | 26.2 $\pm$ 19.2 | 30.9 $\pm$ 18.7 | 6.9 $\pm$ 6.0   |
|            | Average % of total fragment intensity    | 36.5 $\pm$ 26.1 | 43.0 $\pm$ 25.4 | 7.6 $\pm$ 10.3  |
| XIP        | Average % occurrence in primary sequence | 4.8 $\pm$ 2.2   | 4.7 $\pm$ 1.3   | 4.4 $\pm$ 2.5   |
|            | Average % of total fragments             | 11.7 $\pm$ 8.6  | 15.8 $\pm$ 10.2 | 8.2 $\pm$ 5.9   |
|            | Average % of total fragment intensity    | 25.0 $\pm$ 18.4 | 28.6 $\pm$ 18.9 | 16.8 $\pm$ 15.8 |
| AIX or XIA | Average % occurrence in primary sequence | 6.9 $\pm$ 2.7   | 8.7 $\pm$ 2.4   | 8.4 $\pm$ 3.8   |
|            | Average % of total fragments             | 6.2 $\pm$ 4.7   | 7.5 $\pm$ 5.9   | 9.0 $\pm$ 5.7   |
|            | Average % of total fragment intensity    | 5.8 $\pm$ 7.0   | 7.5 $\pm$ 10.5  | 8.9 $\pm$ 8.5   |
| GIX or XIG | Average % occurrence in primary sequence | 7.1 $\pm$ 3.0   | 8.1 $\pm$ 2.2   | 7.3 $\pm$ 3.4   |
|            | Average % of total fragments             | 7.1 $\pm$ 7.6   | 6.6 $\pm$ 7.0   | 7.3 $\pm$ 4.7   |
|            | Average % of total fragment intensity    | 7.6 $\pm$ 10.3  | 6.7 $\pm$ 9.0   | 7.8 $\pm$ 8.0   |
| EIX or XIE | Average % occurrence in primary sequence | 9.1 $\pm$ 5.6   | 6.7 $\pm$ 2.1   | 6.6 $\pm$ 4.9   |

|             |                                          |           |           |             |
|-------------|------------------------------------------|-----------|-----------|-------------|
| LIX or XIJL | Average % of total fragments             | 9.7 ± 8.1 | 7.1 ± 6.5 | 6.3 ± 6.8   |
|             | Average % of total fragment intensity    | 6.0 ± 6.8 | 4.4 ± 5.8 | 5.0 ± 8.9   |
|             | Average % occurrence in primary sequence | 8.6 ± 2.8 | 9.0 ± 2.3 | 9.8 ± 4.0   |
|             | Average % of total fragments             | 8.0 ± 4.9 | 7.5 ± 6.0 | 12.4 ± 7.1  |
|             | Average % of total fragment intensity    | 7.5 ± 7.5 | 6.7 ± 9.7 | 14.1 ± 12.0 |
|             | Average % occurrence in primary sequence | 5.7 ± 2.3 | 5.7 ± 1.2 | 5.4 ± 2.6   |
| IIX or XIJ  | Average % of total fragments             | 5.7 ± 4.3 | 5.3 ± 4.7 | 6.3 ± 4.8   |
|             | Average % of total fragment intensity    | 5.3 ± 6.4 | 4.4 ± 7.3 | 7.1 ± 8.0   |
|             | Average % occurrence in primary sequence | 9.6 ± 4.1 | 8.1 ± 2.6 | 8.4 ± 5.4   |
| KIX or XIK  | Average % of total fragments             | 8.8 ± 6.2 | 6.8 ± 5.4 | 6.5 ± 7.0   |
|             | Average % of total fragment intensity    | 6.9 ± 8.2 | 5.0 ± 7.7 | 3.3 ± 6.0   |

**Table S5.** Medians and interquartile regions (IQRs) which correspond to boxplots in Figure 2 listed by residue pair type. Data are divided between native monomers (monomeric), native complexes (multimeric), and denatured proteins (denatured). Also listed is percent occurrence within the primary sequence shown as Mean  $\pm$  S.D. Averages are calculated within the context of a single protein and then averaged across the entire respective dataset.

|     |                                          | Monomeric     | Multimeric    | Denatured     |
|-----|------------------------------------------|---------------|---------------|---------------|
| DIP | Average % occurrence in primary sequence | 5.9 $\pm$ 2.0 | 5.6 $\pm$ 1.4 | 4.2 $\pm$ 2.8 |
|     | Median % of total fragments              | 20            | 25            | 6.0           |
|     | IQR % of total fragments                 | 11-37         | 17-41         | 3.0-11        |
|     | Median % of total fragment intensity     | 30            | 39            | 4.4           |
|     | IQR % of total fragment intensity        | 14-57         | 24-60         | 0.8-10        |
| XIP | Average % occurrence in primary sequence | 4.8 $\pm$ 2.2 | 4.7 $\pm$ 1.3 | 4.4 $\pm$ 2.5 |
|     | Median % of total fragments              | 9.5           | 13            | 6.9           |
|     | IQR % of total fragments                 | 5.8-16        | 8.9-20        | 3.9-11        |
|     | Median % of total fragment intensity     | 22            | 25            | 13            |
|     | IQR % of total fragment intensity        | 9.9-35        | 16-38         | 3.7-27        |

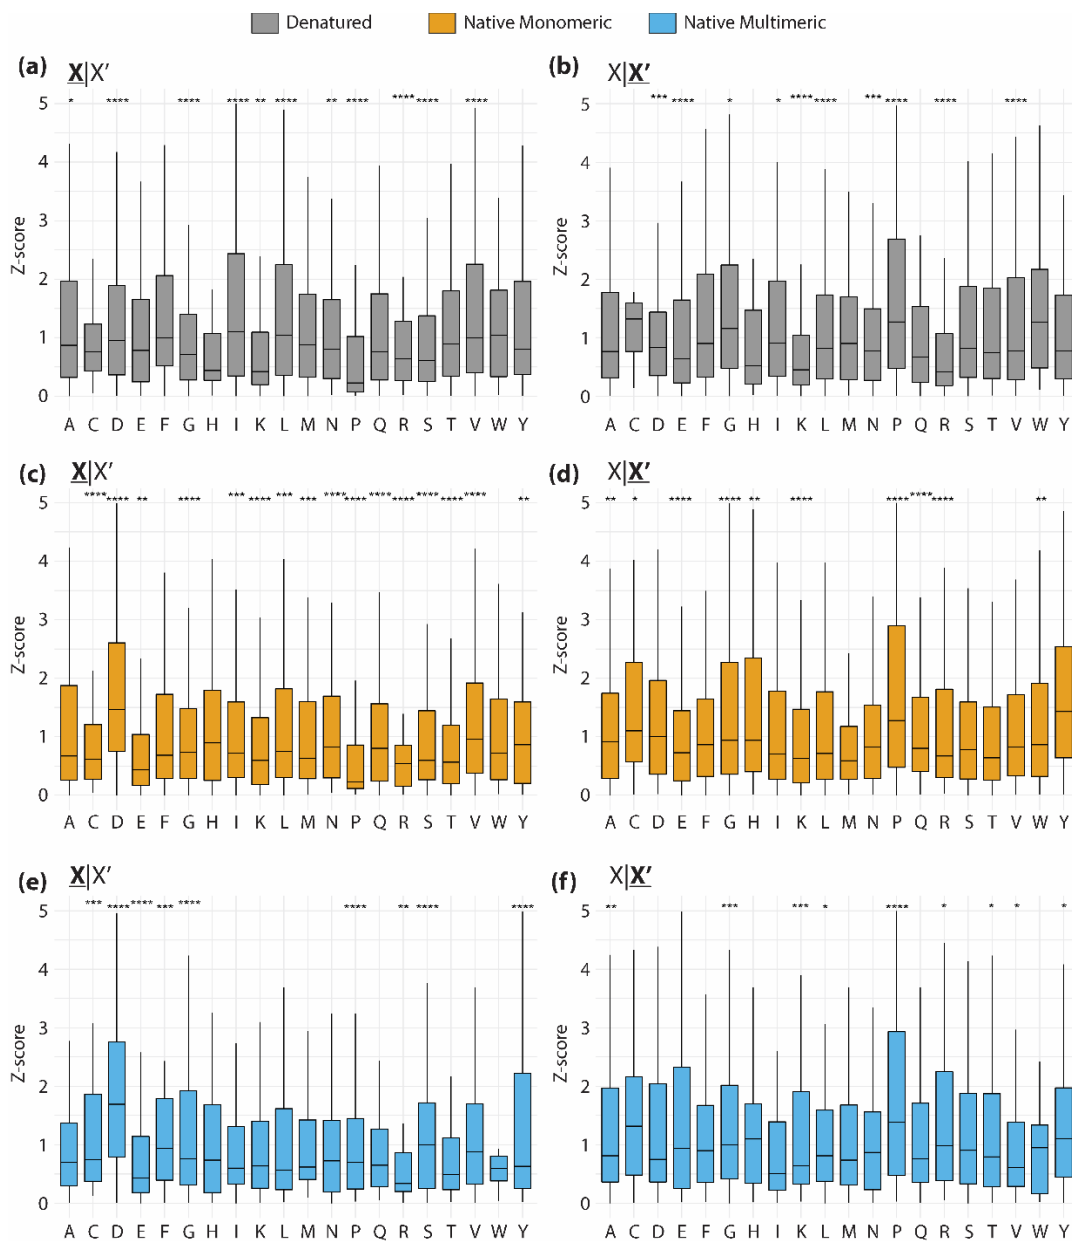

**Figure S6.** Distribution of z-scores plotted by residue. Distributions are divided by each residue N-terminal ( $\underline{X}|X'$ ) or C-terminal ( $X|\underline{X}'$ ) to the site of fragmentation, and further divided into denatured proteins (gray), native monomers (gold), and native multimers (blue). (a) Shows the distribution for residues N-terminal ( $\underline{X}|X'$ ) or (b) C-terminal ( $X|\underline{X}'$ ) for denatured proteins. (c) Shows the distribution for residues N-terminal ( $\underline{X}|X'$ ) or (d) C-terminal ( $X|\underline{X}'$ ) for native monomers. And (e) shows the distribution for residues N-terminal ( $\underline{X}|X'$ ) or (f) C-terminal ( $X|\underline{X}'$ ) for native multimers. Asterisks denote significant differences from the base-mean as determined by a multiple pairwise Wilcoxon-Mann-Whitney test, multiple-test corrected using the Bonferroni method ( $p < 0.05$  is denoted by one asterisk,  $p \leq 0.01$  is denoted by two asterisks,  $p \leq 0.001$  is denoted by three asterisks, and  $p \leq 0.0001$  is denoted by four asterisks).

**Table S6.** Summary of average fragment intensity z-scores by residue pair type. Values are shown as Mean  $\pm$  S.D. Z-scores are calculated within the context of a single protein and then averaged across the entire dataset. Data are divided between native monomers (monomeric), native complexes (multimeric), and denatured proteins (denatured).

|                         | <b>Monomeric</b>   | <b>Multimeric</b> | <b>Denatured</b>  |
|-------------------------|--------------------|-------------------|-------------------|
| Average z-score (X X)   | -1.3e-18 $\pm$ 1.0 | 1.8e-18 $\pm$ 1.0 | 1.0e-18 $\pm$ 1.0 |
| Average z-score (D X)   | 1.2 $\pm$ 2.5      | 1.1 $\pm$ 2.7     | 0.2 $\pm$ 1.2     |
| Average z-score (X P)   | 0.8 $\pm$ 2.6      | 0.7 $\pm$ 2.6     | 0.7 $\pm$ 2.2     |
| Average z-score (D P)   | 4.8 $\pm$ 4.8      | 4.3 $\pm$ 5.0     | 1.3 $\pm$ 2.3     |
| Range of z-scores (D X) | 23.0 to -0.8       | 22.7 to -0.7      | 11.3 to -0.7      |
| Range of z-scores (X P) | 21.2 to -0.9       | 22.7 to -0.7      | 16.2 to -0.8      |

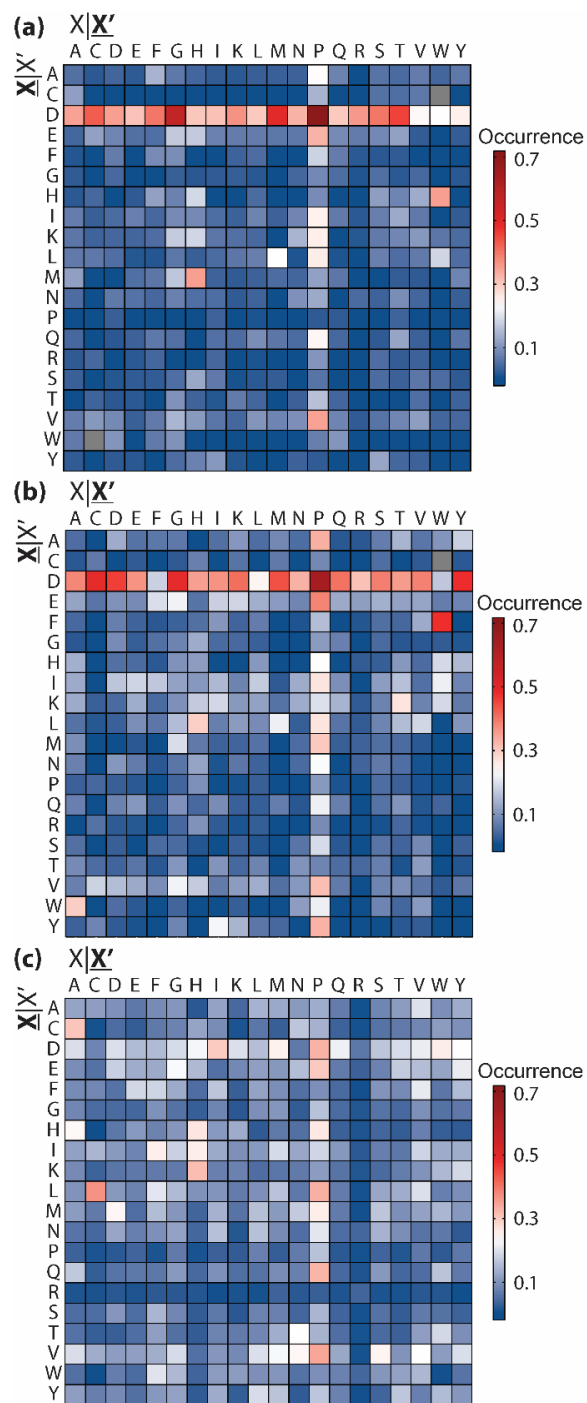

**Figure S7.** Fragmentation occurrence by residue pair for (a) native multimers, (b) native monomers, and (c) denatured proteins. Fragmentation occurrence is defined as the number of fragments divided by twice the total number of residue pairs which occur in the primary sequence for a given amino acid combination. Fragmentation occurrences range from 0-64%, 0-50%, and 0-37% for native multimers, native monomers, and denatured proteins respectively. Residue pairs that are not observed in the dataset are shown in gray. For all panels,  $\underline{X}|X'$  refers to the residue N-terminal to the fragmentation site and  $X|\underline{X}'$  refers the residue C-terminal to the fragmentation site.

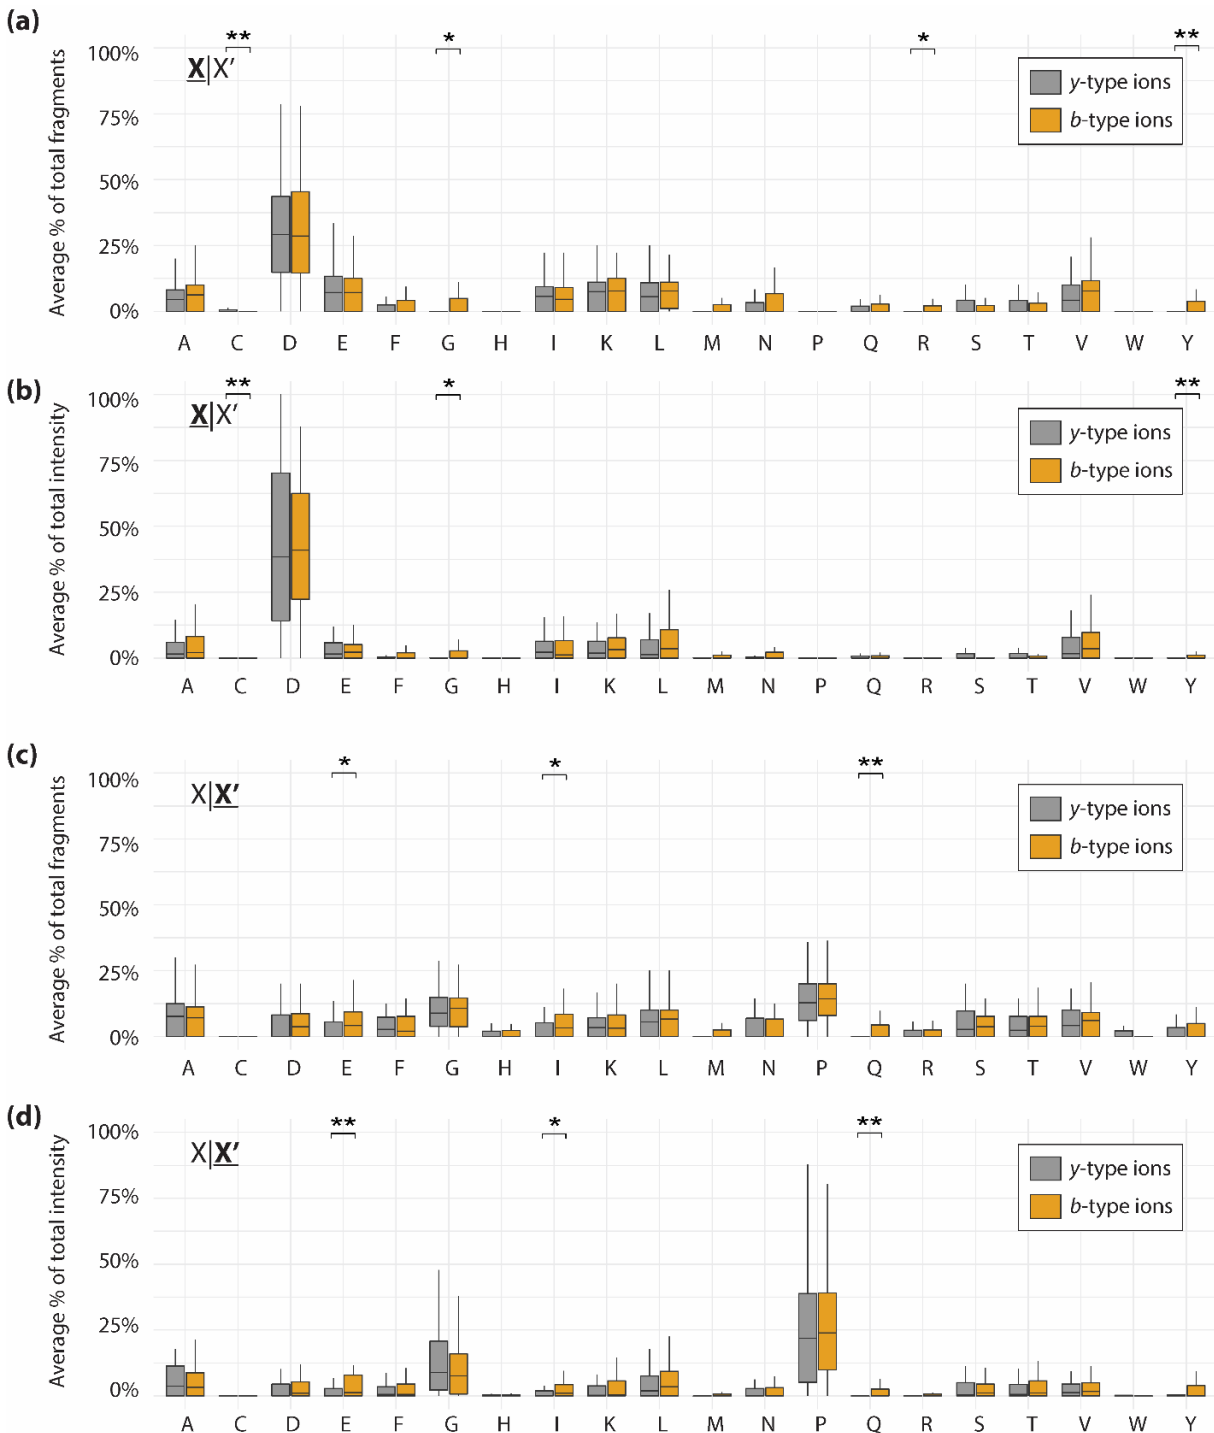

**Figure S8.** Average percent of total fragments or fragment intensity by residue for native multimers; data are divided into *y*-type (gray) and *b*-type (gold) ions. Average percent of total fragments (a) or total fragment intensity (b) contributed by each residue N-terminal (X|X') to the fragmentation site. Average percent of total fragments (c) or total fragment intensity (d) by each residue C-terminal (X|X') to the fragmentation site. Brackets indicate a comparison between two data points using a Wilcoxon-Mann-Whitney test ( $p < 0.05$  is denoted by one asterisk,  $p \leq 0.01$  is denoted by two asterisks,  $p \leq 0.001$  is denoted by three asterisks,  $p \leq 0.0001$  is denoted by four asterisks).



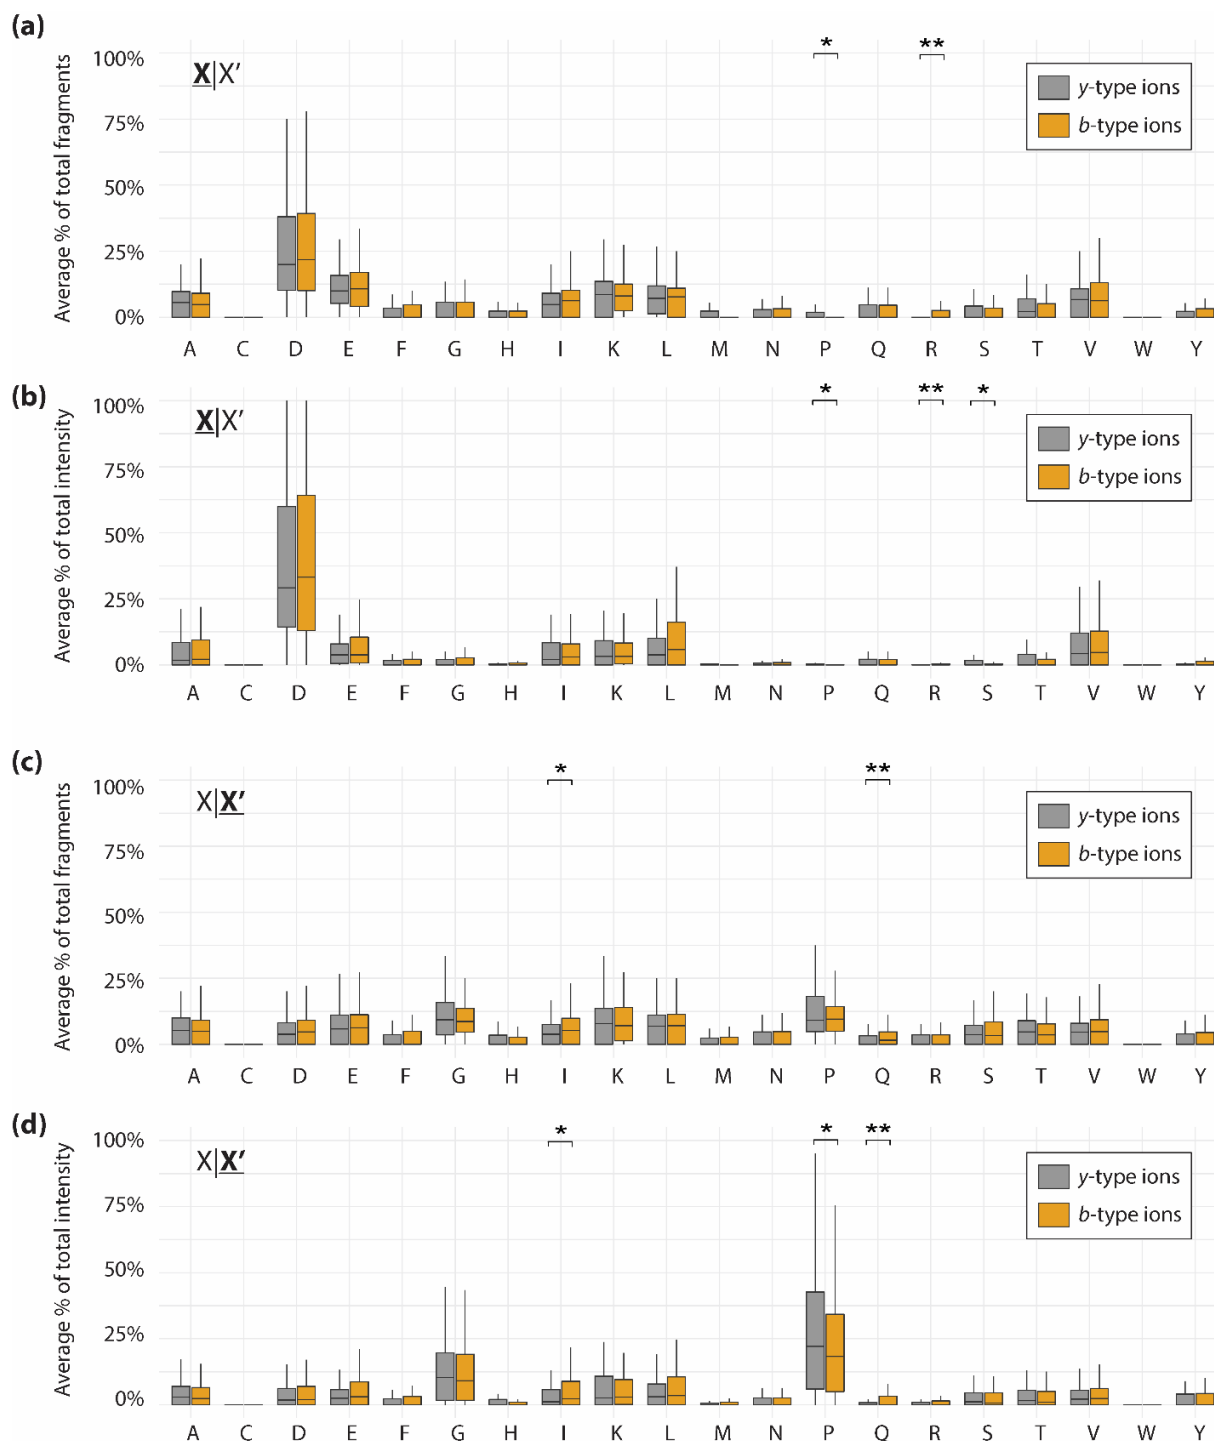

**Figure S9.** Average percent of total fragments or fragment intensity by residue for native monomers; data are divided into *y*-type (gray) and *b*-type (gold) ions. Average percent of total fragments (a) or total fragment intensity (b) contributed by each residue N-terminal ( $X|X'$ ) to the fragmentation site. Average percent of total fragments (c) or total fragment intensity (d) by each residue C-terminal ( $X|X'$ ) to the fragmentation site. Brackets indicate a comparison between two data points using a Wilcoxon-Mann-Whitney test ( $p < 0.05$  is denoted by one asterisk,  $p \leq 0.01$  is denoted by two asterisks,  $p \leq 0.001$  is denoted by three asterisks,  $p \leq 0.0001$  is denoted by four asterisks).

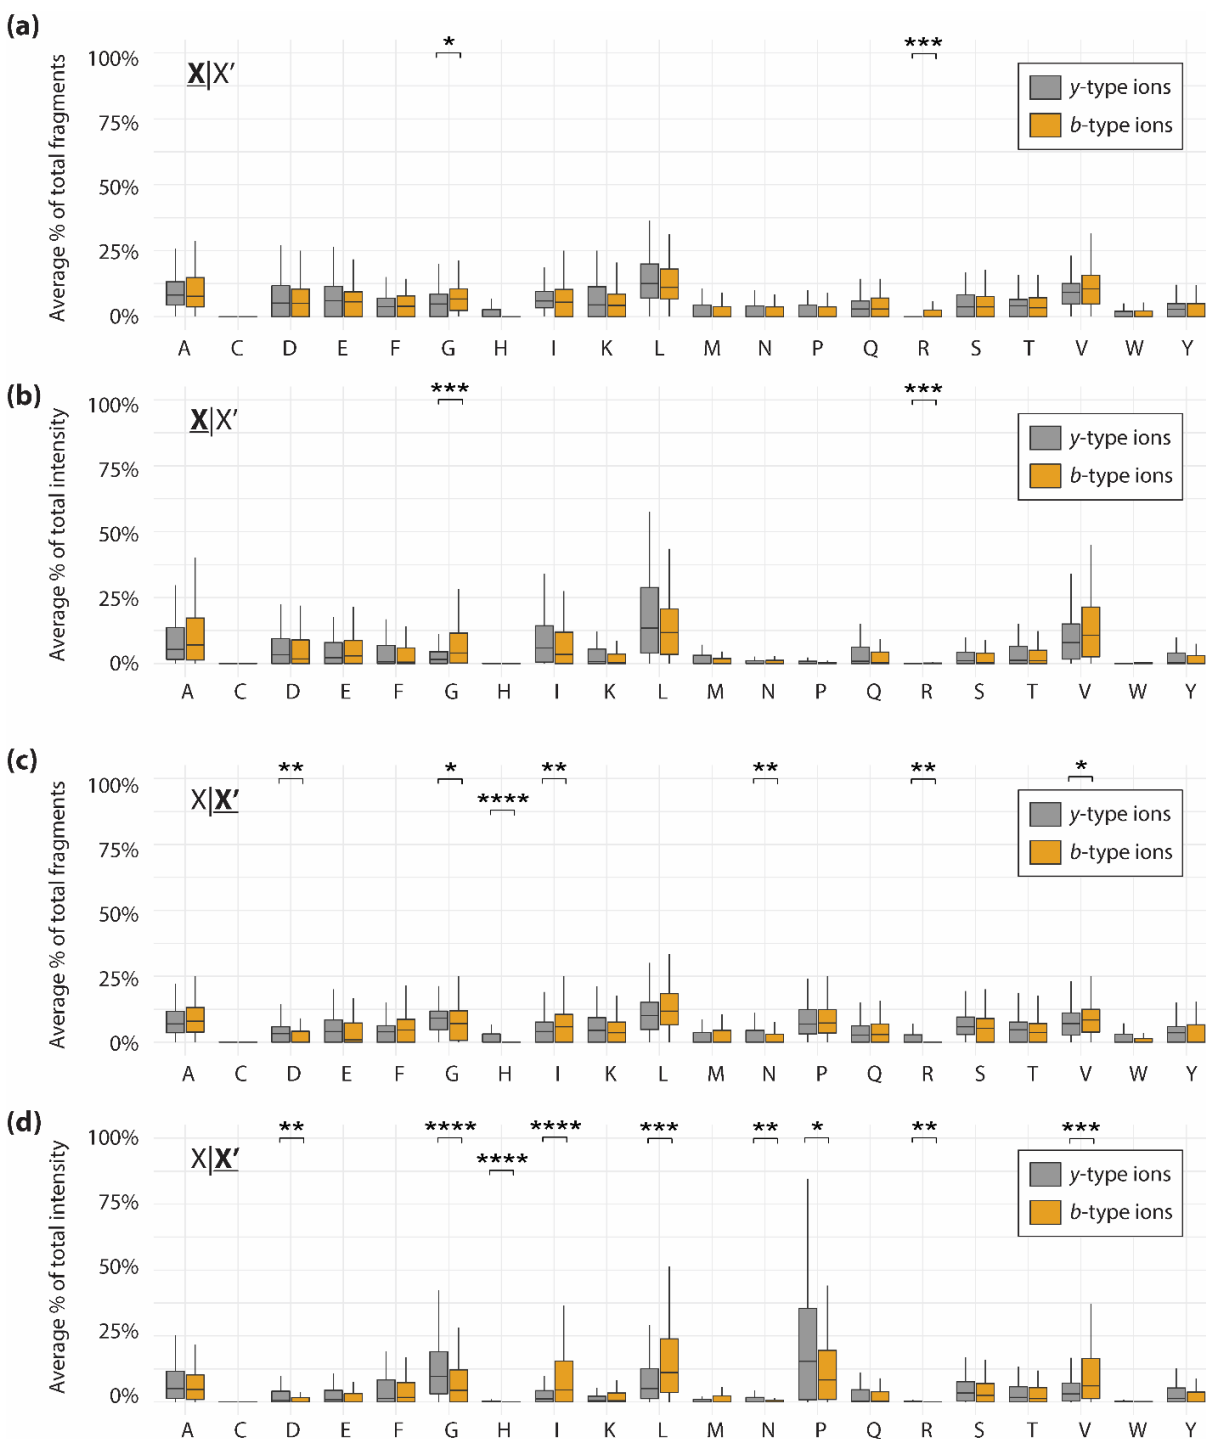

**Figure S10.** Average percent of total fragments or fragment intensity by residue for denatured proteins; data are divided into *y*-type (gray) and *b*-type (gold) ions. Average percent of total fragments (a) or total fragment intensity (b) contributed by each residue N-terminal ( $\underline{X}|X'$ ) to the fragmentation site. Average percent of total fragments (c) or total fragment intensity (d) by each residue C-terminal ( $X|\underline{X}'$ ) to the fragmentation site. Brackets indicate a comparison between two data points using a Wilcoxon-Mann-Whitney test ( $p < 0.05$  is denoted by one asterisk,  $p \leq 0.01$  is denoted by two asterisks,  $p \leq 0.001$  is denoted by three asterisks,  $p \leq 0.0001$  is denoted by four asterisks).

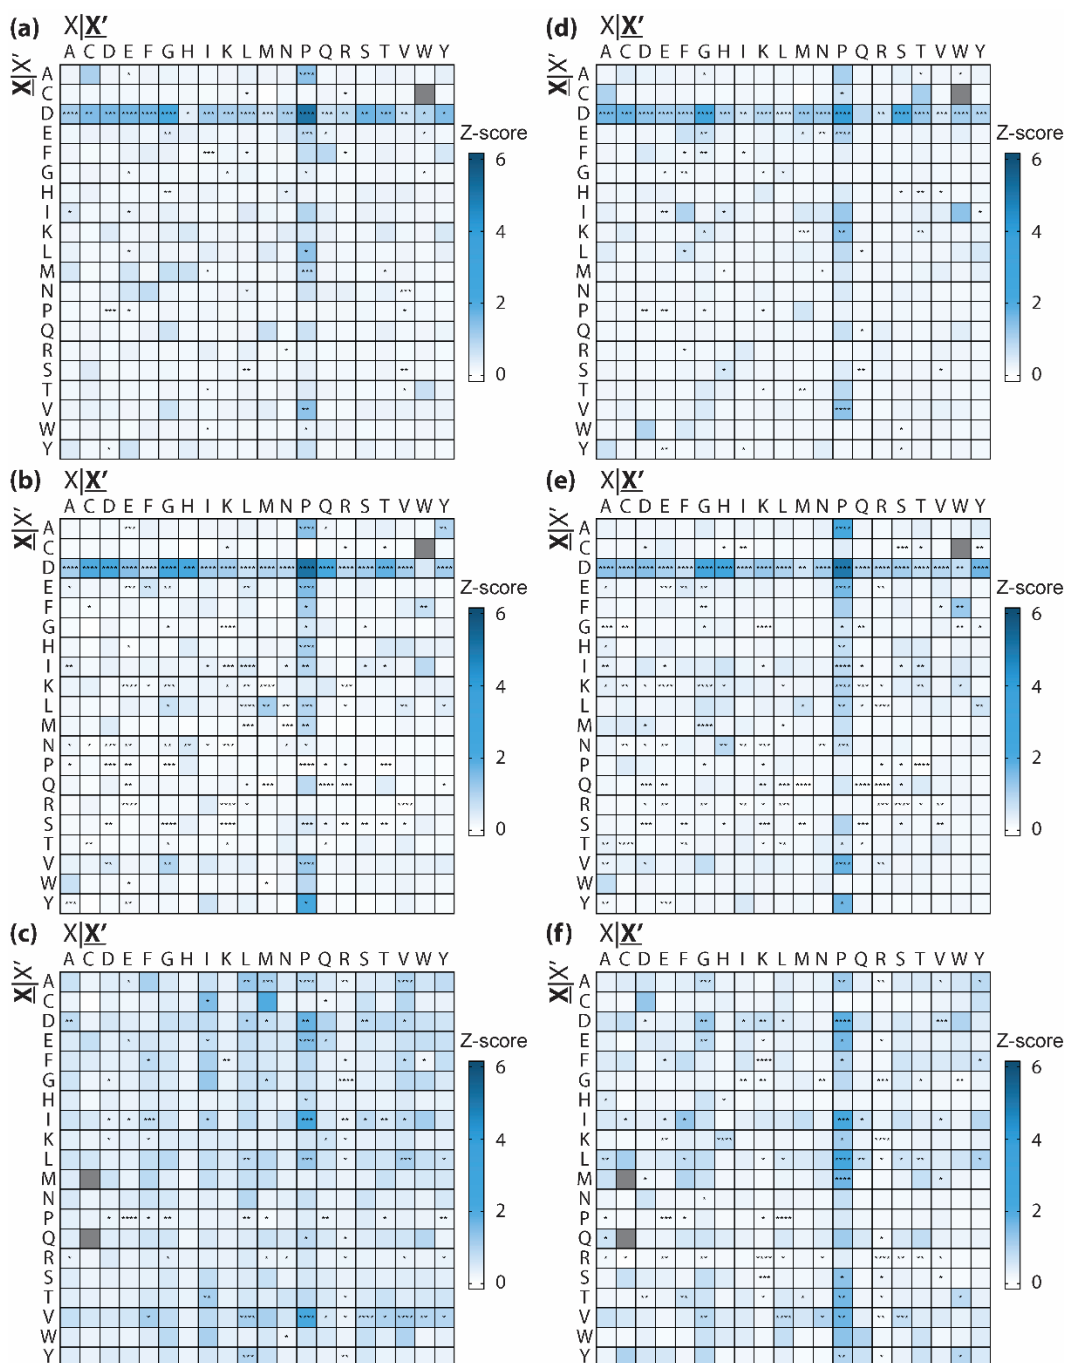

**Figure S11.** Average *b*-type fragment ion intensity z-score by residue pair for (a) native multimers, (b) native monomers, and (c) denatured proteins. Average *y*-type fragment ion intensity z-score by residue pair for (d) native multimers, (e) native monomers, and (f) denatured proteins. Residue pairs that are not observed in the dataset are shown in gray. Asterisks denote significant differences from the base-mean as determined by a multiple pairwise WMW test, corrected using the Bonferroni method ( $p < 0.05$  is denoted by one asterisk,  $p \leq 0.01$  is denoted by two asterisks,  $p \leq 0.001$  is denoted by three asterisks,  $p \leq 0.0001$  is denoted by four asterisks). For all panels,  $X|X'$  refers to the residue N-terminal to the fragmentation site and  $X|X'$  refers the residue C-terminal to the fragmentation site.

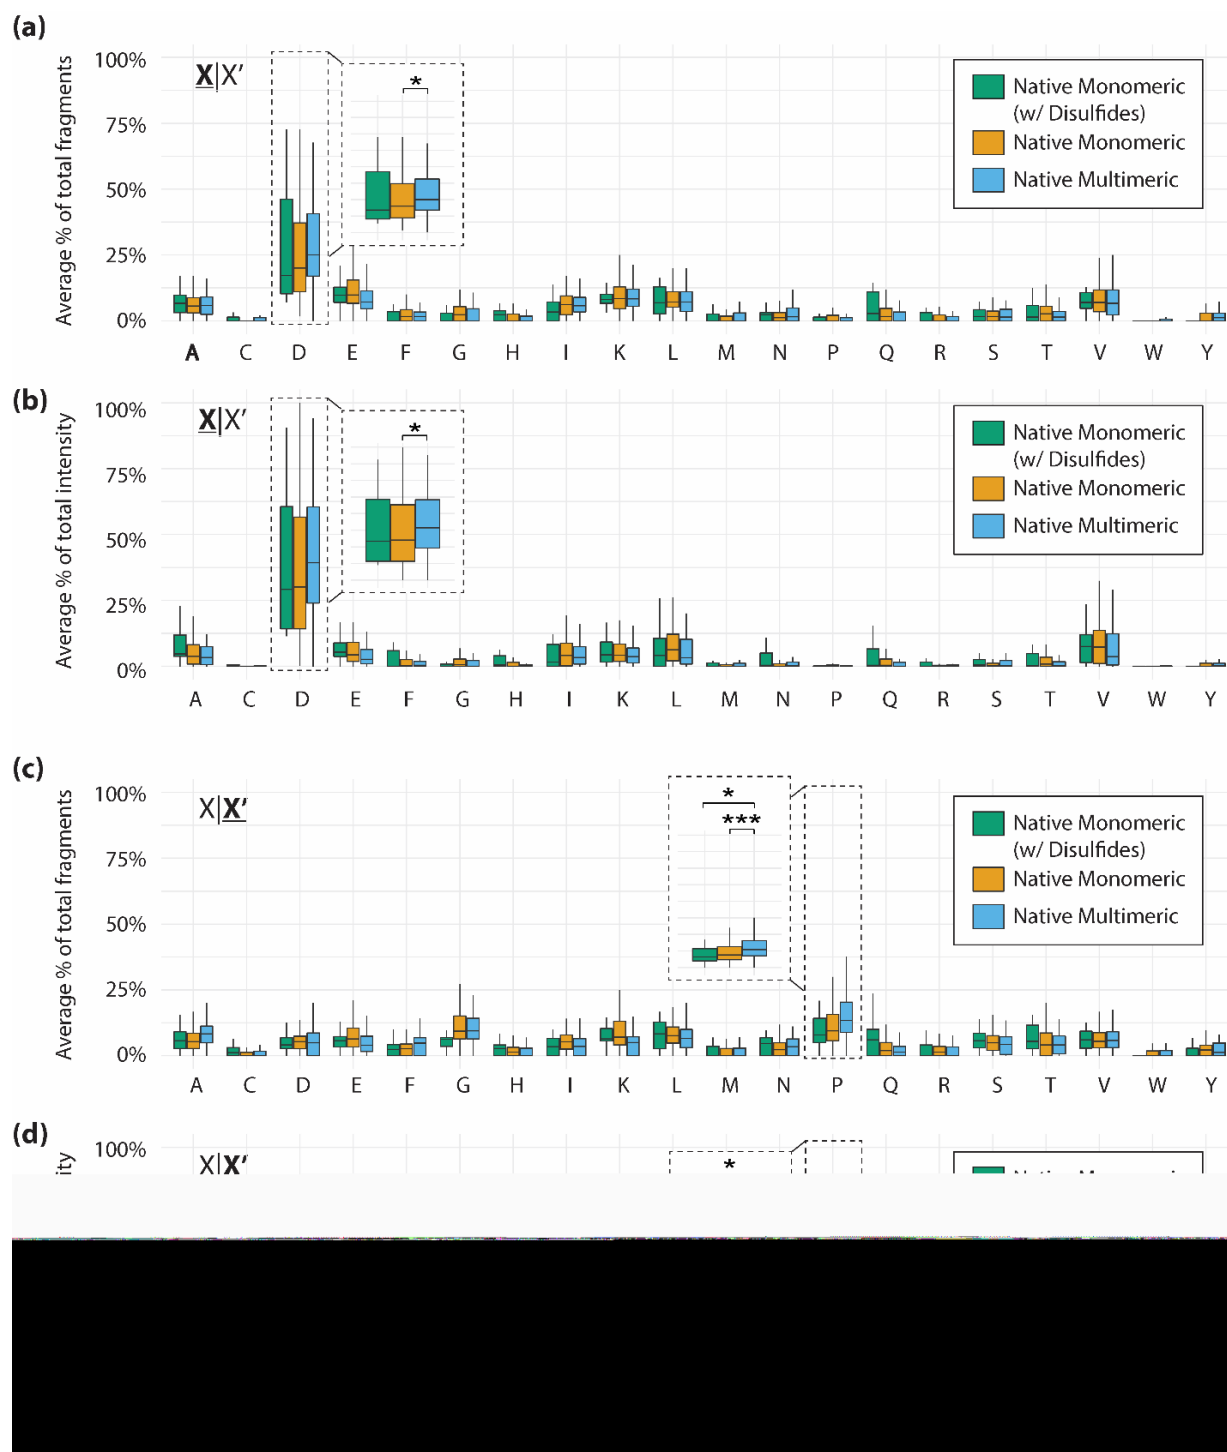

**Figure S12.** Average percent of total fragments (a) or total fragment intensity (b) contributed by each residue N-terminal ( $\underline{X}|X'$ ) to the fragmentation site. Average percent of total fragments (c) or total fragment intensity (d) by each residue C-terminal ( $X|\underline{X}'$ ) to the fragmentation site. Data are divided into native monomeric proteins containing disulfide bridges (green), all native monomeric proteins (gold), and all native multimeric proteins (blue). Brackets indicate a comparison between two data points using a Wilcoxon-Mann-Whitney test ( $p < 0.05$  is denoted by one asterisk and  $p \leq 0.001$  is denoted by three asterisks).

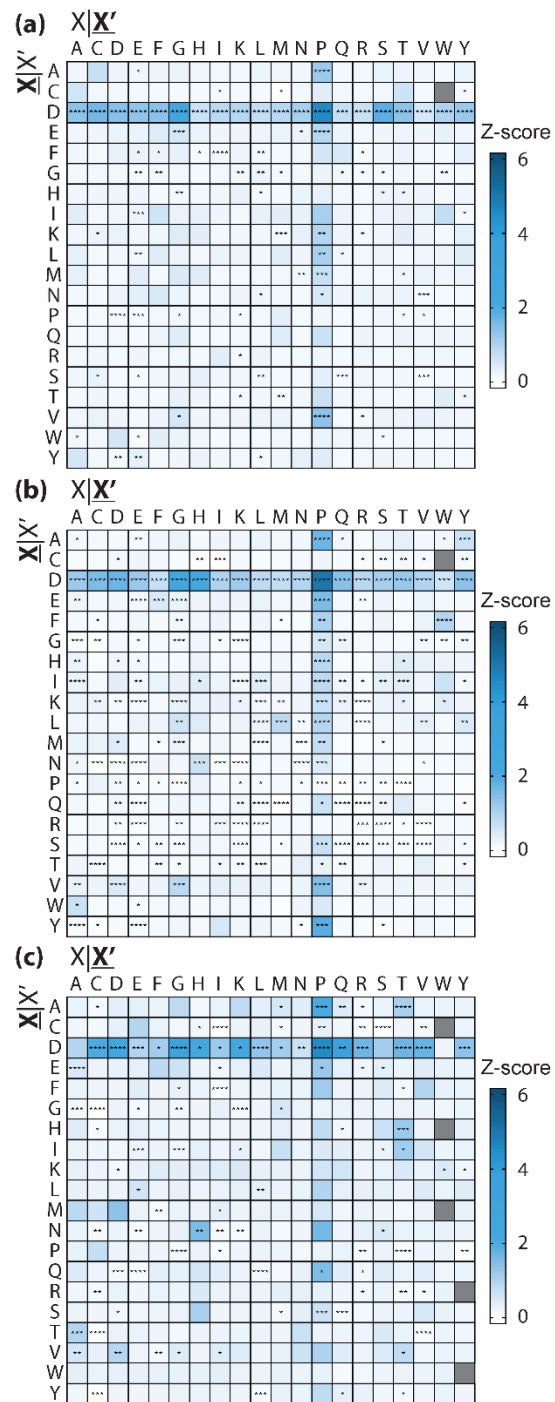

**Figure S13.** Average fragment intensity z-score by residue pair for (a) all native multimers, (b) all native monomers, and (c) native monomers containing disulfide bridges. Residue pairs that are not observed in the dataset are shown in gray. Asterisks denote significant differences from the base-mean as determined by a multiple pairwise WMW test, corrected using the Bonferroni method ( $p < 0.05$  is denoted by one asterisk,  $p \leq 0.01$  is denoted by two asterisks,  $p \leq 0.001$  is denoted by three asterisks,  $p \leq 0.0001$  is denoted by four asterisks). For all panels,  $\underline{X}|X'$  refers to the residue N-terminal to the fragmentation site and  $X|\underline{X}'$  refers the residue C-terminal to the fragmentation site.

**Table S7.** Summary of average percent intensity contributed by each residue N-terminal (X|X') or C-terminal (X|X') to the site of fragmentation for the native monomeric dataset. Average percent intensities are used as weights in calculating the native-tailored C-score and nFPS.

| N-terminal Residue | Average percent of total intensity (%) | C-terminal Residue | Average percent of total intensity (%) |
|--------------------|----------------------------------------|--------------------|----------------------------------------|
| A                  | 6.6                                    | A                  | 5.0                                    |
| C                  | 0.1                                    | C                  | 0.9                                    |
| D                  | 37                                     | D                  | 5.3                                    |
| E                  | 6.9                                    | E                  | 5.1                                    |
| F                  | 2.3                                    | F                  | 2.4                                    |
| G                  | 2.2                                    | G                  | 13                                     |
| H                  | 1.2                                    | H                  | 2.2                                    |
| I                  | 5.7                                    | I                  | 4.8                                    |
| K                  | 7.4                                    | K                  | 6.4                                    |
| L                  | 8.3                                    | L                  | 6.8                                    |
| M                  | 1.3                                    | M                  | 1.2                                    |
| N                  | 1.4                                    | N                  | 2.4                                    |
| P                  | 0.7                                    | P                  | 25                                     |
| Q                  | 2.1                                    | Q                  | 2.5                                    |
| R                  | 0.6                                    | R                  | 1.5                                    |
| S                  | 2.0                                    | S                  | 3.6                                    |
| T                  | 2.4                                    | T                  | 3.8                                    |
| V                  | 9.8                                    | V                  | 4.7                                    |
| Y                  | 0.5                                    | Y                  | 0.7                                    |
| W                  | 2.1                                    | W                  | 2.6                                    |

**Table S8.** Summary of average percent intensity contributed by each residue N-terminal (X|X') or C-terminal (X|X') to the site of fragmentation for the native multimeric dataset. Average percent intensities are used as weights in calculating the native-tailored C-score and nFPS.

| N-terminal Residue | Average percent of total intensity (%) | C-terminal Residue | Average percent of total intensity (%) |
|--------------------|----------------------------------------|--------------------|----------------------------------------|
| A                  | 6.1                                    | A                  | 8.8                                    |
| C                  | 1.7                                    | C                  | 2.3                                    |
| D                  | 4.3                                    | D                  | 4.8                                    |
| E                  | 4.5                                    | E                  | 4.2                                    |
| F                  | 2.4                                    | F                  | 4.1                                    |
| G                  | 1.4                                    | G                  | 12                                     |
| H                  | 0.7                                    | H                  | 1.4                                    |
| I                  | 6.3                                    | I                  | 2.5                                    |
| K                  | 6.5                                    | K                  | 3.6                                    |
| L                  | 7.8                                    | L                  | 5.5                                    |
| M                  | 1.2                                    | M                  | 1.3                                    |
| N                  | 2.2                                    | N                  | 2.6                                    |
| P                  | 0.5                                    | P                  | 29                                     |
| Q                  | 1.1                                    | Q                  | 1.7                                    |
| R                  | 0.9                                    | R                  | 1.2                                    |
| S                  | 1.6                                    | S                  | 4.0                                    |
| T                  | 1.6                                    | T                  | 4.1                                    |
| V                  | 8.5                                    | V                  | 4.1                                    |
| Y                  | 0.3                                    | Y                  | 0.9                                    |
| W                  | 1.8                                    | W                  | 2.3                                    |

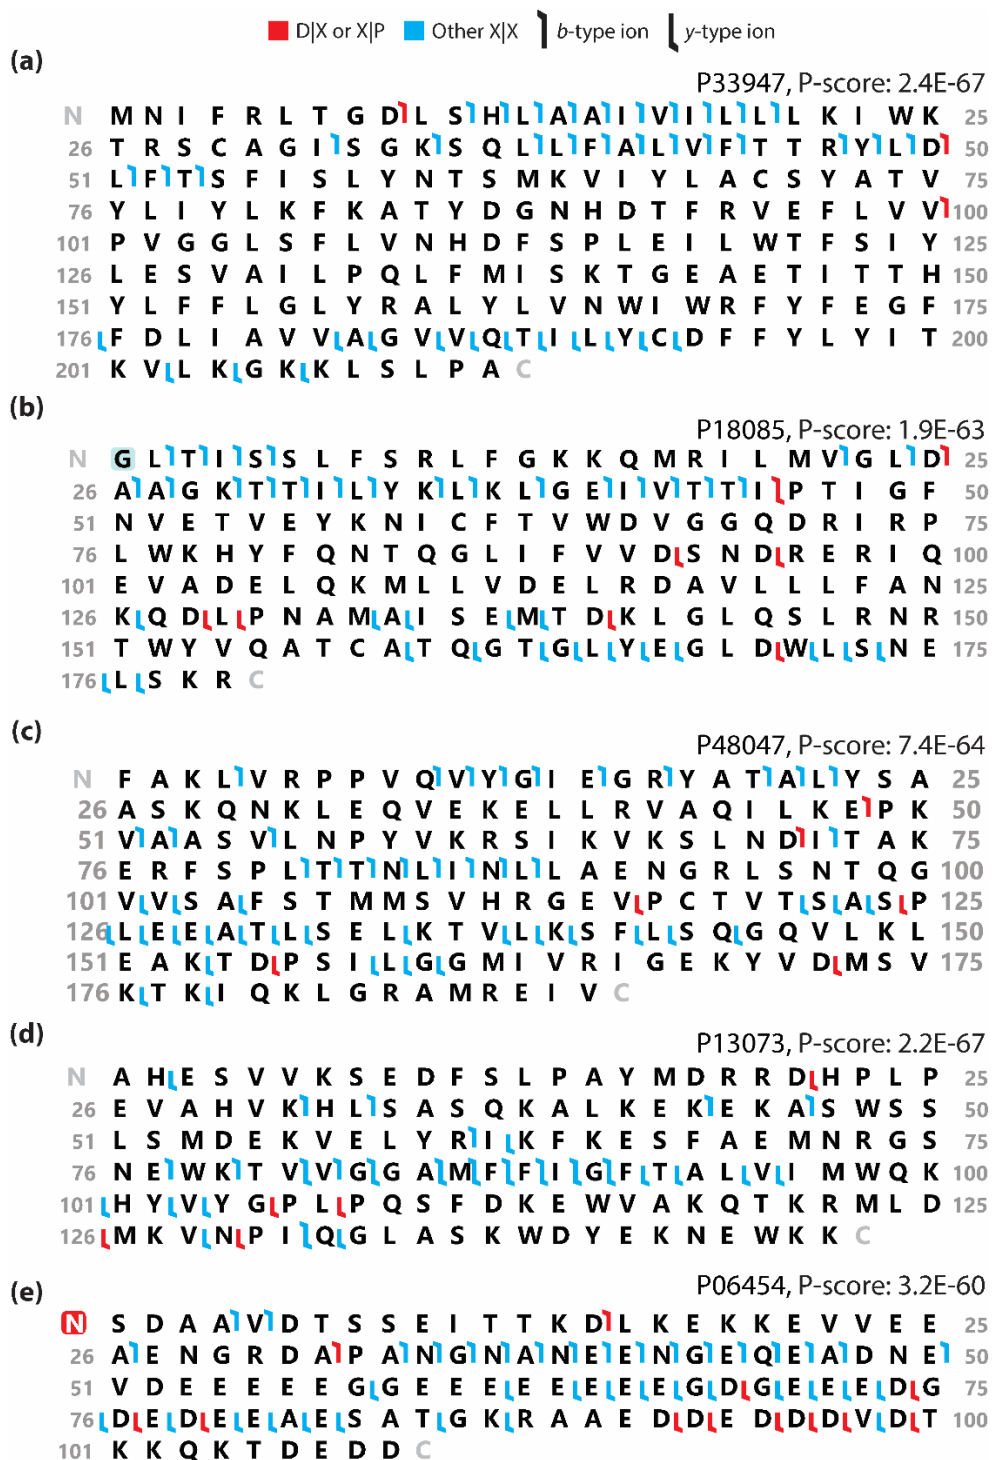

**Figure S14.** Fragmentation maps for five denatured proteins including (a) ER lumen protein-retaining receptor 2, (b) ADP-ribosylation factor 4 (blue denotes N-myristoyl-glycine), (c) ATP synthase subunit O, (d) cytochrome c oxidase subunit 4, and (e) prothymosin alpha (red box denotes N-terminal acetylation). Corresponding accession numbers and assigned P-scores are listed. Flags represent identified matching fragment ions and are colored red to denote a D|X or X|P fragment ion or blue for a fragment ion between any other residue pair. Flag directionality denotes a *b*-type (left to right) or *y*-type (right to left) ion.



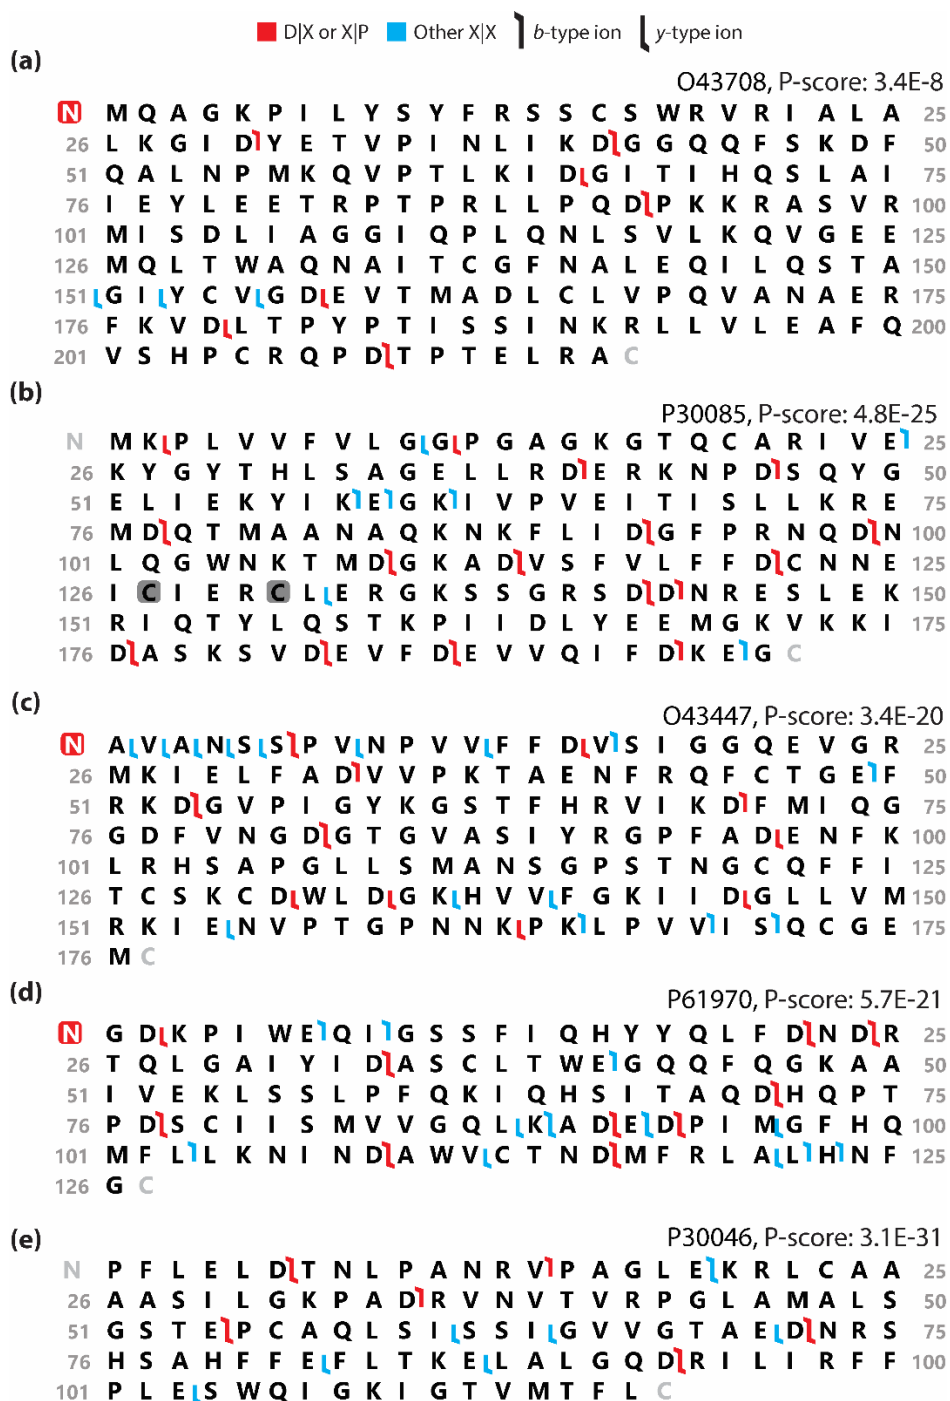

**Figure S15.** Fragmentation maps for five native monomers including (a) maleylacetoacetate isomerase, (b) UMP-CMP kinase (grey boxes denote disulfide bridge), (c) peptidyl-prolyl cis-trans isomerase H, (d) nuclear transport factor 2, and (e) D-dopachrome decarboxylase. Corresponding accession numbers and assigned P-scores are listed. Red boxes denote N-terminal acetylation. Flags represent identified matching fragment ions and are colored red to denote a D|X or X|P fragment ion or blue for a fragment ion between any other residue pair. Flag directionality denotes a *b*-type (left to right) or *y*-type (right to left) ion.

$p(X,X')$  = experimental probability of fragmentation between residues X and X' ( $X|X'$ )  
 e.g.  $p(D,E) = p(D,X') \times p(X,E)$

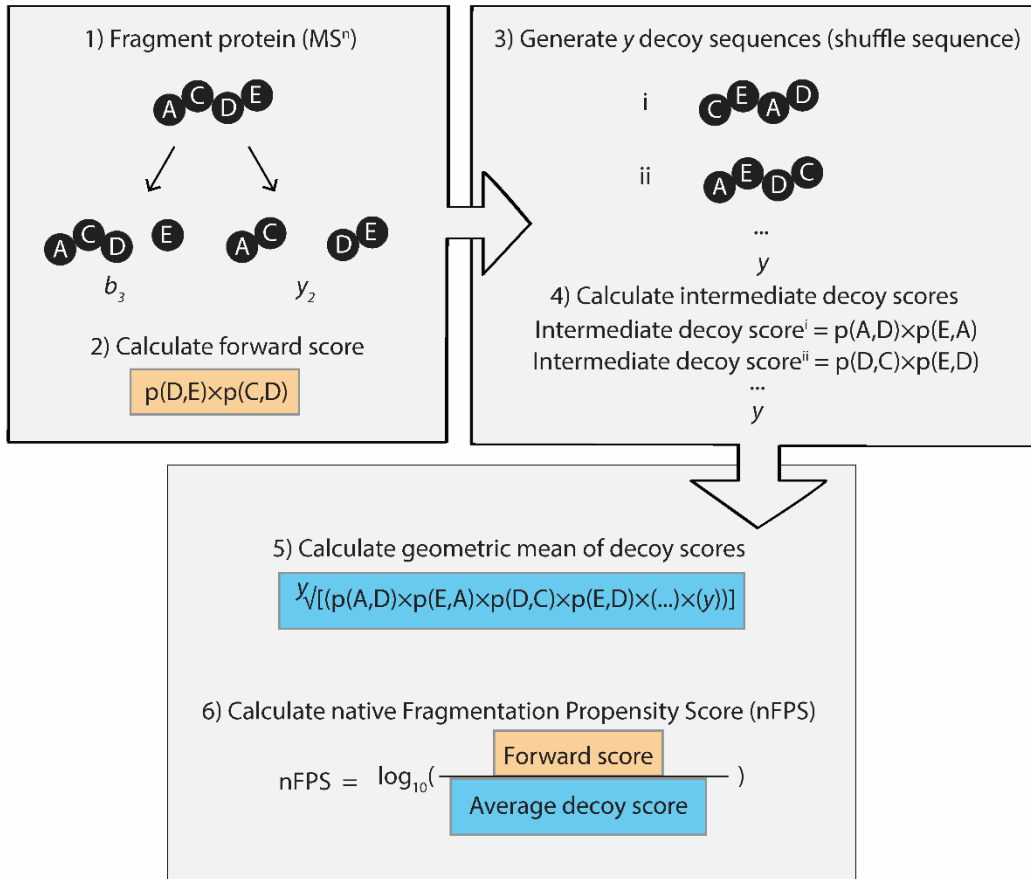

**Figure S16.** Schematic for calculating the native Fragmentation Propensity Score (nFPS). Example is conducted assuming the true protein has sequence 'ACDE' and produces ions  $b_3$  and  $y_2$  upon fragmentation.
